# Supplementary material
Source: MDPI journal article supplement (https://www.mdpi.com/2313-433X/9/6/106)
Supplement: s1 [file s1]

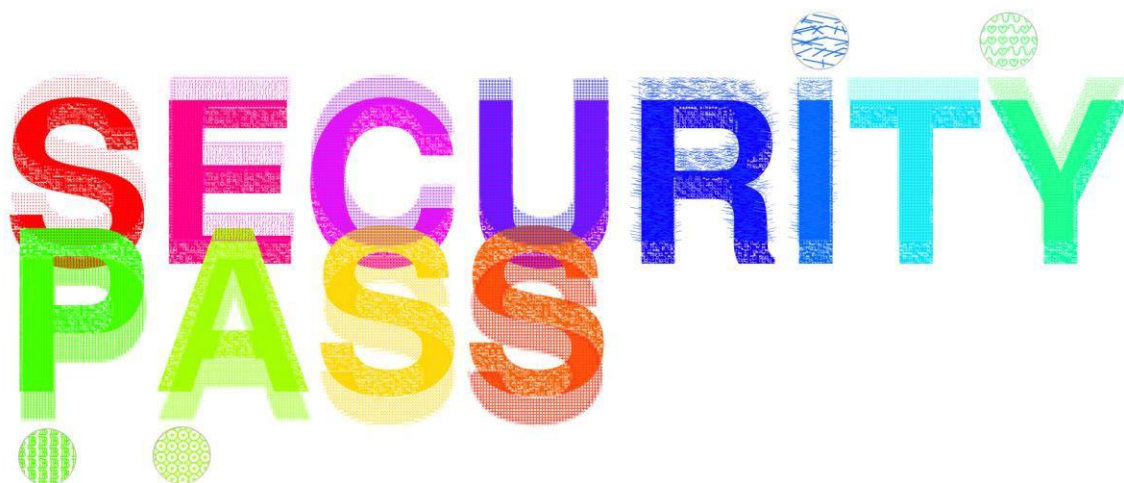

**Figure S1.** The deviations of the shape distribution depending on detected hue for Euroscale coated V2 color setting.

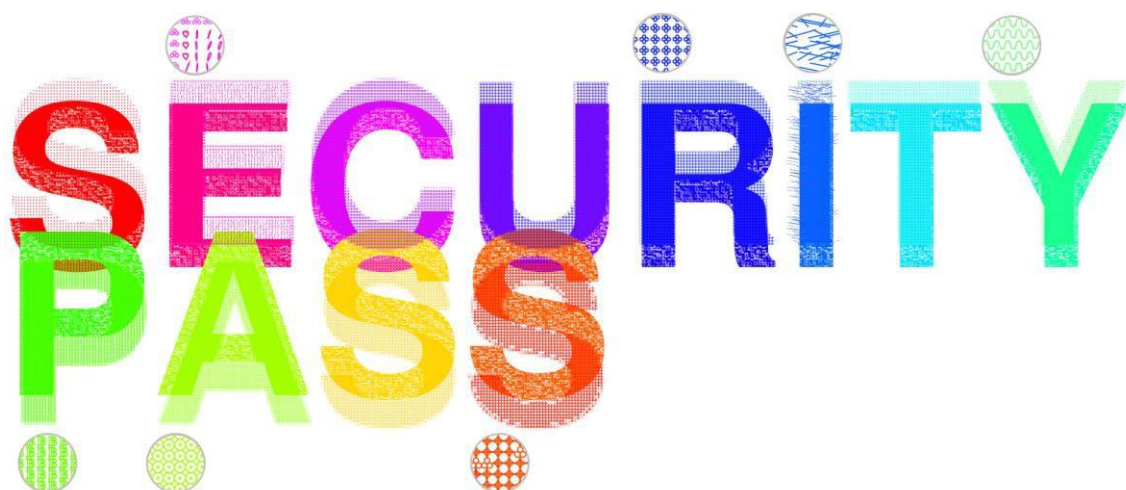

**Figure S2.** The deviations of the shape distribution depending on detected hue for Japan web coated color setting.

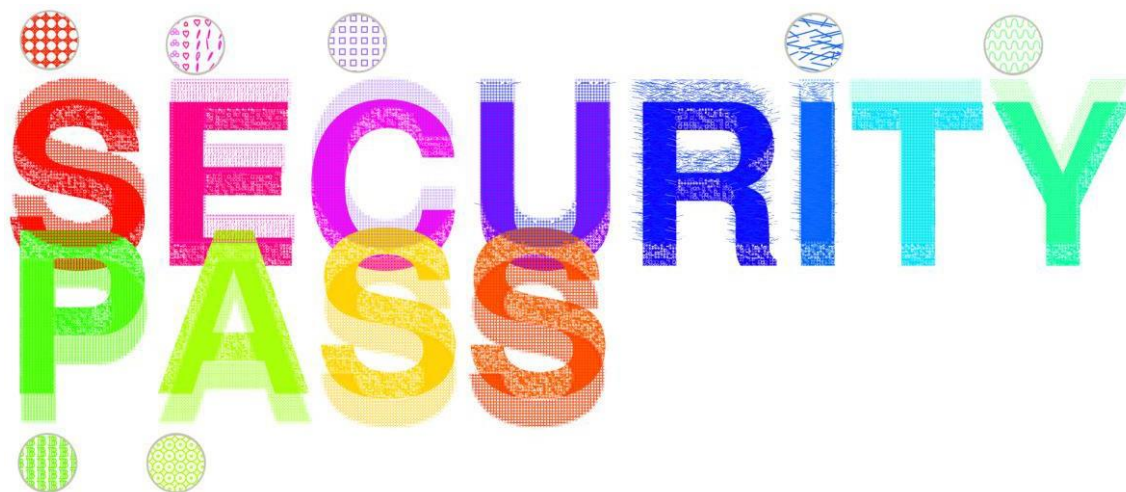

**Figure S3.** The deviations of the shape distribution depending on detected hue for Photoshop 5 color setting.

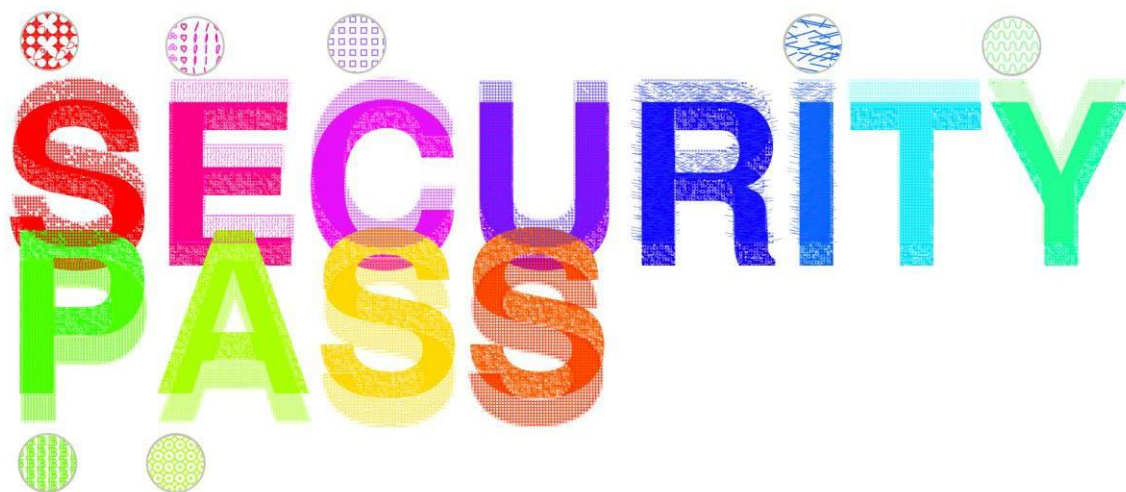

**Figure S4.** The deviations of the shape distribution depending on detected hue for U.S. web coated V2 color setting.
